# Supplementary material for: Does metabolite channeling accelerate enzyme-catalyzed cascade reactions?
Source: PubMed Central journal article supplement (PMC5325314; doi:10.1371/journal.pone.0172673), 2017-02-24
Supplement: pone.0172673.s001.pdf [file pone.0172673.s001.pdf]

1 **Does metabolite channeling accelerate enzyme-catalyzed cascade**  
 2 **reactions? Supporting Information.**

3 Liubov Poshyvailo, Eric von Lieres, and Svyatoslav Kondrat

4 **S1. EVOLUTION EQUATIONS FOR UNI-SUBSTRATE REACTIONS**

Applying the law of mass action to Eqs. (1) and (2) of the main text, we obtain a system of ordinary differential equations, which defines the evolution of concentrations of various species in the system. The equation for the substrate concentration reads

$$\frac{d[S]}{dt} = -a_1[E_1][S] + d_1[SE_1] - a_{ch}[E_{12}][S] + d_{ch}[SE_{12}] + v_S, \quad (1)$$

which is Eq. (12) of the main text. The concentrations of enzymes, intermediates and Michaelis-Menten complexes of the non-channeled subsystem satisfy

$$\frac{d[E_1]}{dt} = d_1[E_1S] - a_1[E_1][S] + k_1[SE_1] \quad (2a)$$

$$\frac{d[SE_1]}{dt} = a_1[E_1][S] - d_1[SE_1] - k_1[SE_1] \quad (2b)$$

$$\frac{d[I]}{dt} = k_1[SE_1] - a_2[E_2][I] + d_2[IE_2] - k_{deg}[I] \quad (2c)$$

$$\frac{d[E_2]}{dt} = d_2[IE_2] - a_2[E_2][I] + k_2[IE_2] \quad (2d)$$

$$\frac{d[IE_2]}{dt} = a_2[E_2][I] - d_2[IE_2] - k_2[IE_2]. \quad (2e)$$

The evolution equations for the channeled subsystem are

$$\frac{d[E_{12}]}{dt} = d_{ch}[SE_{12}] - a_{ch}[S][E_{12}] + k_2^{ch}[E_{12}I] \quad (3a)$$

$$\frac{d[SE_{12}]}{dt} = a_{ch}[S][E_{12}] - d_{ch}[SE_{12}] - k_1^{ch}[SE_{12}] \quad (3b)$$

$$\frac{d[IE_{12}]}{dt} = k_1^{ch}[SE_{12}] - k_{ch}[IE_{12}] \quad (3c)$$

$$\frac{d[\mathbf{E}_{12}\mathbf{I}]}{dt} = k_{ch}[\mathbf{IE}_{12}] - k_2^{ch}[\mathbf{E}_{12}\mathbf{I}]. \quad (3d)$$

Finally, the product formation velocity is

$$v_P = \frac{d[\mathbf{P}]}{dt} = k_2[\mathbf{IE}_2] + k_2^{ch}[\mathbf{E}_{12}\mathbf{I}]. \quad (4)$$

These evolution equations must be supplemented by the mass conservation. For the non-channeled subsystem we have

$$[\mathbf{E}_1]_{\text{tot}} = [\mathbf{E}_1] + [\mathbf{SE}_1] \quad (5a)$$

$$[\mathbf{E}_2]_{\text{tot}} = [\mathbf{E}_2] + [\mathbf{IE}_2], \quad (5b)$$

where  $[\mathbf{E}_i]_{\text{tot}}$  is the total (supplied) concentration of  $\mathbf{E}_i$  ( $i = 1, 2$ ), and

$$[\mathbf{E}_{12}]_{\text{tot}} = [\mathbf{E}_{12}] + [\mathbf{SE}_{12}] + [\mathbf{IE}_{12}] + [\mathbf{E}_{12}\mathbf{I}], \quad (6)$$

for the channeled subsystems. We note that the total enzyme concentrations ( $[\mathbf{E}_i]_{\text{tot}}$  and  $[\mathbf{E}_{12}]_{\text{tot}}$ ) are shown on all plots in the main text, where we skip ‘tot’ to avoid clumsy notations. For the substrate we have

$$[\mathbf{S}]_0 = [\mathbf{S}] + [\mathbf{SE}_1] + [\mathbf{IE}_2] + [\mathbf{I}] + [\mathbf{SE}_{12}] + [\mathbf{IE}_{12}] + [\mathbf{E}_{12}\mathbf{I}] + [\mathbf{P}] - v_{st}t, \quad (7)$$

5 where  $[\mathbf{S}]_0$  is the initial substrate concentration. Thus, we have in total a system of seven  
6 independent equations.

7

## S2. BI-SUBSTRATE REACTIONS

8 We consider here the situation when the first reaction in a cascade is bi-substrate. For  
9 simplicity we limit our considerations to irreversible transformations, but include dissocia-  
10 tions as before. We shall also assume that for sequential (single displacement) reactions, the  
11 rate of transformation/dissociation of the second product of the first enzyme (if any) is fast,  
12 as compared to  $k_1$  (see below), so that the second product can be ignored.

### A. Sequential ordered reactions

We consider the following cascade

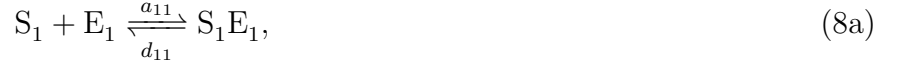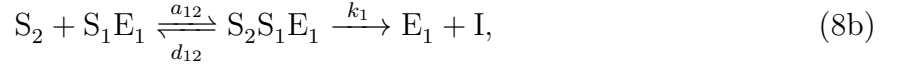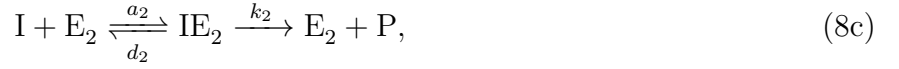

with the mass conservation for enzyme  $E_1$

$$[E_1]_{\text{tot}} = [E_1] + [S_1 E_1] + [S_2 S_1 E_1]. \quad (8d)$$

The corresponding channeled reaction reads

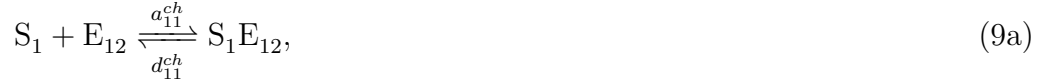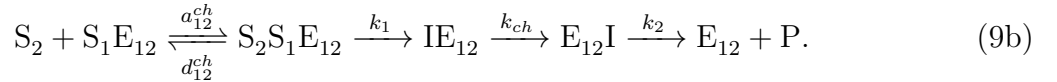

The evolution equation can be readily written down and solved in the steady state approximation, assuming that the steady state concentration of intermediates  $[I]_{\text{ss}} < \infty$ . The result is (in the double reciprocal form and removing tot in  $[E_1]_{\text{tot}}$  and  $[E_{12}]_{\text{tot}}$  for brevity)

$$\frac{1}{v_{\text{non}}} = \frac{1}{k_1 [E_1]} \left\{ 1 + \frac{K_M^{(12)}}{[S_2]} + \frac{k_1}{a_{11}} \frac{1}{[S_1]} + \frac{K_M^{(12)} K_S^{(11)}}{[S_1][S_2]} \right\}, \quad (10)$$

where  $K_S^{(11)} = d_{11}/a_{11}$  and  $K_M^{(12)} = (k_1 + d_{12})/a_{12}$ ; the velocity of the channeled reaction

$$\frac{1}{v_{ch}} = \frac{1}{k_1 [E_{12}]} \left\{ \frac{k_1}{k_{\text{tot}}^{ch}} + \frac{K_M^{ch}}{[S_2]} + \frac{k_1}{a_{11}^{ch}} \frac{1}{[S_1]} + \frac{K_M^{ch} K_S^{ch}}{[S_1][S_2]} \right\}, \quad (11)$$

<sup>14</sup> where  $1/k_{\text{tot}}^{ch} = 1/k_1 + 1/k_2 + 1/k_{ch}$ ,  $K_M^{ch} = (k_1 + d_{12}^{ch})/a_{12}^{ch}$ , and  $K_S^{ch} = d_{11}^{ch}/a_{11}^{ch}$ .

Similarly as in the case of uni-substrate reactions, channeling can accelerate or decelerate the reaction velocity at low substrate concentrations, depending on the relation between  $K_M^{(12)}$ ,  $K_S^{(11)}$ ,  $K_M^{ch}$  and  $K_S^{ch}$ . At high concentrations of  $[S_1] \gg \max(k_1/a_{11}, K_M^{(12)} K_S^{(11)}/[S_2], k_1/a_{11}^{ch}, K_M^{ch} K_S^{ch}/[S_2])$ , Eqs. (10) and (11) reduce to the uni-substrate case (Eqs. (3) and (4) of the main text). If  $[S_2] \gg K_M^{(12)}$  and  $[S_2] \gg K_M^{ch}$  but  $[S_1]$  is finite, then we obtain that channeling accelerates the reaction velocity if

$$\gamma_{11}^{ch}/\gamma_{11} < 1 - \frac{k_a^{(11)} [S_1]}{\gamma_{11}} \left( \frac{1}{k_2} + \frac{1}{k_{ch}} \right), \quad (12)$$

15 where  $\gamma_{11}$  and  $\gamma_{11}^{ch}$  are the degrees of the diffusion control of the first reaction in the cascade  
 16 and its channeled counterpart, respectively, and  $k_a^{(11)}$  is the corresponding microscopic as-  
 17 sociation rate constant, taken the same for the channeled and non-channeled reactions (see  
 18 Eqs. (10) of the main text).

19 Finally, when both  $[S_1]$  and  $[S_2]$  are high, we recover the maximum reaction velocities  
 20 given by Eqs. (7a) and (7b) of the main text.

21

## B. Sequential random reactions

We consider the following cascade

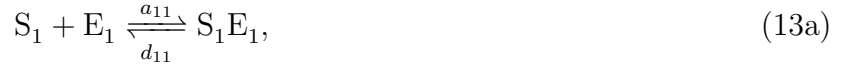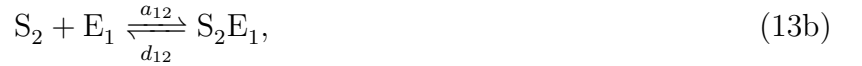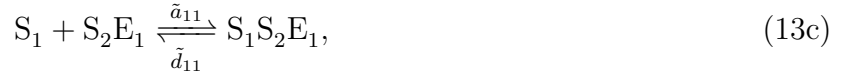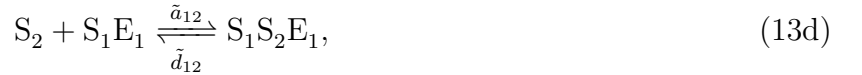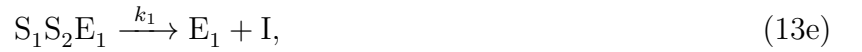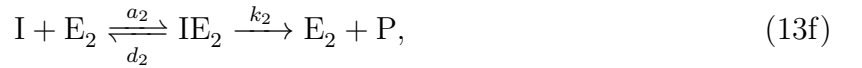

with the mass conservation for enzyme  $E_1$

$$[E_1]_{\text{tot}} = [E_1] + [S_1 E_1] + [S_2 E_1] + [S_2 S_1 E_1]. \quad (13g)$$

The corresponding channeled reaction reads

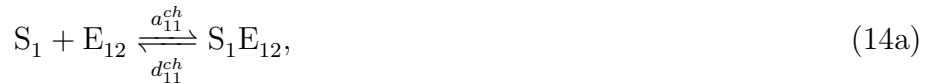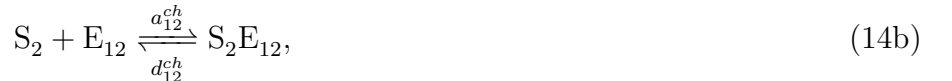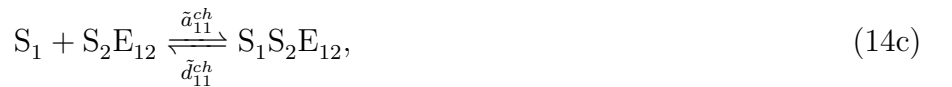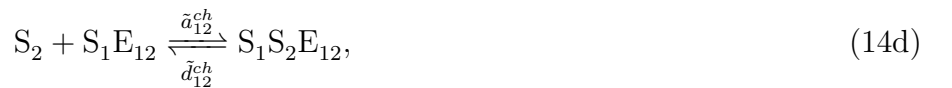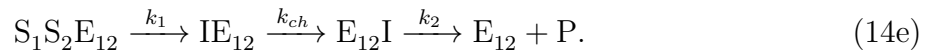

Random reactions are slightly more complex and the resulting equations are cumbersome and little appealing. To simplify them we assume rapid equilibrium for the first two reactions, *i.e.* for reactions (13a) and (13b) and their channeled counterparts (14a) and (14b). In this case we readily obtain

$$\frac{1}{v_{non}} = \frac{1}{k_1[E_1]} \left\{ 1 + \frac{K_M^{(1)}}{K_{11}[S_2]} + \frac{K_M^{(1)}}{K_{12}[S_1]} + \frac{K_M^{(1)}}{[S_1][S_2]} \right\}, \quad (15)$$

where

$$K_M^{(1)} = \frac{\tilde{d}_{11} + \tilde{d}_{12} + k_1}{\tilde{a}_{11}/K_{12} + \tilde{a}_{12}/K_{11}} \quad (16)$$

and ( $i = 1, 2$ )

$$K_{1i} = \frac{d_{1i}}{a_{1i}}. \quad (17)$$

For the channeled reaction we get

$$\frac{1}{v_{ch}} = \frac{1}{k_1[E_{12}]} \left\{ \frac{k_1}{k_{tot}^{ch}} + \frac{K_M^{ch}}{K_{11}^{ch}[S_2]} + \frac{K_M^{ch}}{K_{12}^{ch}[S_1]} + \frac{K_M^{ch}}{[S_1][S_2]} \right\}, \quad (18)$$

where  $1/k_{tot}^{ch} = 1/k_1 + 1/k_2 + 1/k_{ch}$  as before,

$$K_M^{ch} = \frac{\tilde{d}_{11}^{ch} + \tilde{d}_{12}^{ch} + k_1}{\tilde{a}_{11}^{ch}/K_{12}^{ch} + \tilde{a}_{12}^{ch}/K_{11}^{ch}} \quad (19)$$

and ( $i = 1, 2$ )

$$K_{1i}^{ch} = \frac{d_{1i}^{ch}}{a_{1i}^{ch}}. \quad (20)$$

22 It follows from these equations that for finite substrate concentrations, or when only  
 23 one substrate is in saturation, channeling can accelerate or decelerate the reaction velocity,  
 24 depending on the relations between the various rate constants. However, if the concentration  
 25 of both substrates is high, *viz.*  $[S_i] \gg K_M^{(1)}$  and  $[S_i] \gg K_M^{ch}$ , we recover the case of uni-  
 26 substrate reactions given by Eqs. (7a) and (7b) of the main text.

### C. Ping-pong reactions

In ping-pong or double-displacement reactions, the first substrate ‘activates’ the enzyme (*e.g.* by leaving a functional group at the active center of the enzyme), and the second

substrate is transformed into an intermediate, which can be channeled. The tandem reaction has the form

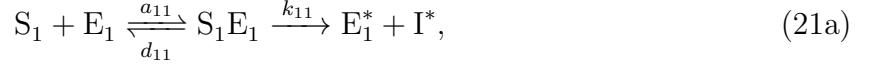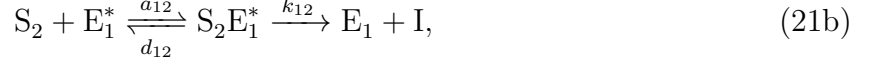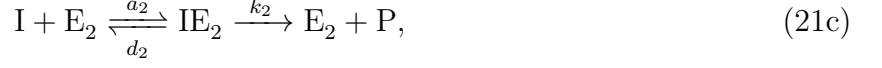

with the mass conservation for enzyme  $E_1$

$$[E_1]_{\text{tot}} = [E_1] + [S_1E_1] + [E_1^*] + [S_2E_1^*]. \quad (21d)$$

The channeled reaction is

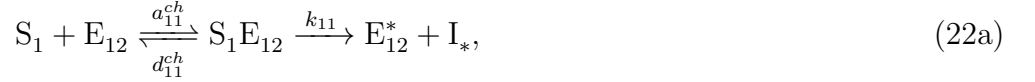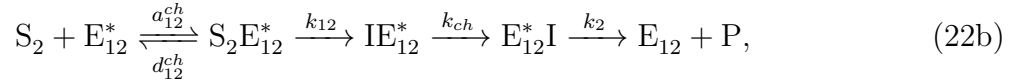

where the mass conservation is

$$[E_{12}]_{\text{tot}} = [E_{12}] + [S_1E_{12}] + [E_{12}^*] + [S_2E_{12}^*] + [IE_{12}^*] + [E_{12}^*I]. \quad (22c)$$

The steady-state reaction velocities can be readily calculated and the result is

$$\frac{1}{v_{non}} = \frac{1}{[E_1]} \left\{ \frac{1}{k_{11}} + \frac{1}{k_{12}} + \frac{K_M^{(11)}}{k_{11}[S_1]} + \frac{K_M^{(12)}}{k_{12}[S_2]} \right\}, \quad (23)$$

where ( $i = 1, 2$ )

$$K_M^{(i)} = \frac{d_{1i} + k_{1i}}{a_{1i}}. \quad (24)$$

For the channeled reaction we get

$$\frac{1}{v_{non}} = \frac{1}{[E_1]} \left\{ \frac{1}{k_{\text{tot}}^{ch}} + \frac{K_{M,ch}^{(11)}}{k_{11}[S_1]} + \frac{K_{M,ch}^{(12)}}{k_{12}[S_2]} \right\}, \quad (25)$$

where  $1/k_{\text{tot}}^{ch} = 1/k_{11} + 1/k_{12} + 1/k_2 + 1/k_{ch}$  and ( $i = 1, 2$ )

$$K_{M,ch}^{(i)} = \frac{d_{1i}^{ch} + k_{1i}}{a_{1i}^{ch}}. \quad (26)$$

Similarly as in all other cases, at low substrate concentrations, channeling can accelerate or decelerate the reaction velocity, depending on the relation between  $K_M^{(1i)}$  and  $K_{M,ch}^{(1i)}$ . At high concentrations of both substrates we have

$$v_{non}^{(max)} = [E_1] (1/k_{11} + 1/k_{12})^{-1} \quad (27)$$

and

$$v_{ch}^{(max)} = k_{tot}^{ch} [E_1]. \quad (28)$$

28 Clearly,  $v_{ch}^{(max)} \leq v_{non}^{(max)}$ , as for the uni-substrate reactions. Note that for ping-pong reactions  
 29 we have the inverse sum,  $1/k_{11} + 1/k_{12}$ , instead of the single reaction constant  $k_1$  (compare  
 30 Eqs. (27) and (28) with Eqs. (7a) and (7b) of the main text).

---
